# Supplementary material
Source: Royal Society of Chemistry journal article supplement (doi:10.1039/d6ay00455e)
Supplement: d6ay00455e1.pdf [file d6ay00455e1.pdf]

## Supplementary Material

1

2

3

4 **Lab-made stencil-printed electrode with silver nanoparticles-modified graphite for**  
5 **the determination of the antibiotic Sulfamethoxazole in different real samples**

6 Gabriele Santos de Carvalho<sup>1</sup>, Anderson da Silva Pereira<sup>1</sup>, Lucila Aranguina  
7 Chiquillan<sup>1</sup>, Wallace Burger Veríssimo de Oliveira<sup>2</sup>, Renato Camargo Matos<sup>2</sup>, Willyam  
8 Róger Padilha Barros<sup>3</sup>, Thalles Pedrosa Lisboa<sup>1#</sup>

9

10 <sup>1</sup> *LECA, Faculdade de Ciências Exatas e Tecnologia, Universidade Federal da Grande*  
11 *Dourados, 79804970, Dourados-MS, Brasil.*

12 <sup>2</sup> *NUPIS, Departamento de Química, Universidade Federal de Juiz de Fora, 36026-900,*  
13 *Juiz de Fora-MG, Brasil.*

14 <sup>3</sup> *GFTE, Faculdade de Ciências Exatas e Tecnologia, Universidade Federal da Grande*  
15 *Dourados, 79804970, Dourados, MS, Brazil.*

16

17 # Corresponding author: [thalleslisboa@ufgd.edu.br](mailto:thalleslisboa@ufgd.edu.br)

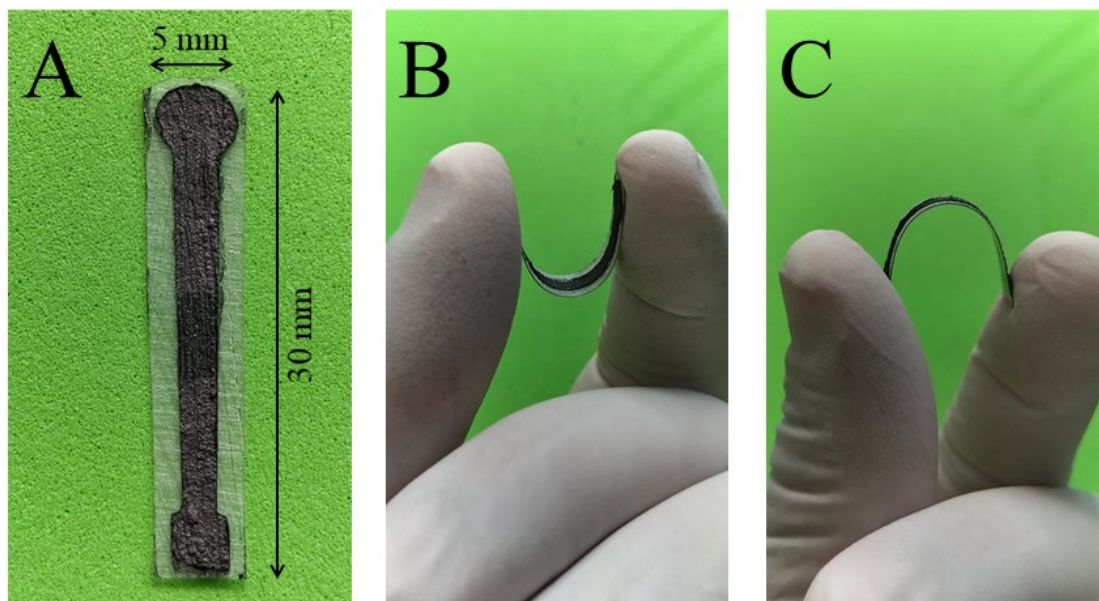

18  
19 **Figure S1.** (A) Real image of the AgNPs@Gr/StPE sensor. Flexibility test of the  
20 AgNPs@Gr/StPE sensor at (B) concave and (C) convex angles.

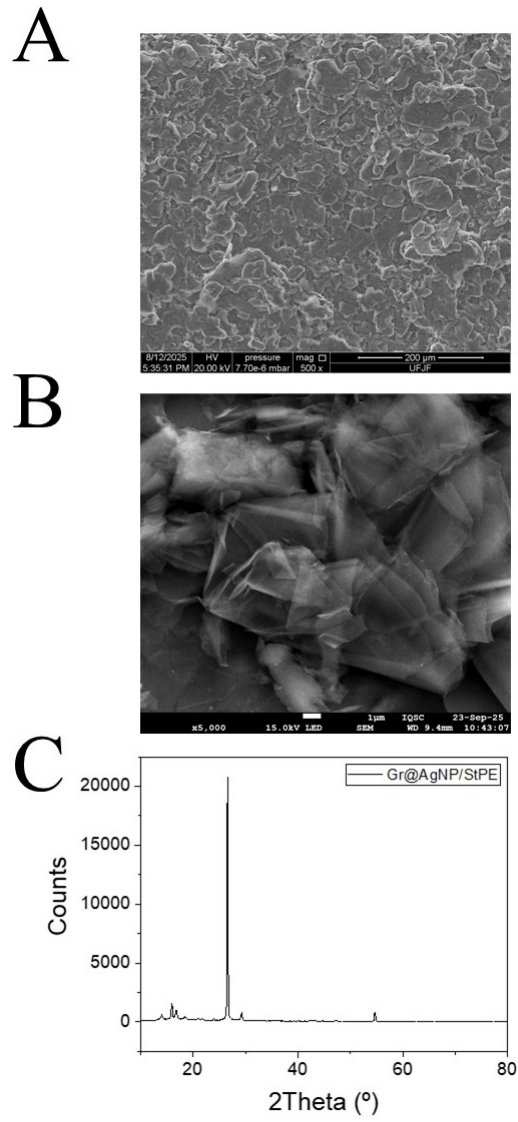

21 **Figure S2.** (A-B) SEM images of the surface of the Gr/StPE sensor. (C) XRD pattern of  
 22 the  $\text{AgNPs@Gr/StPE}$  surface.

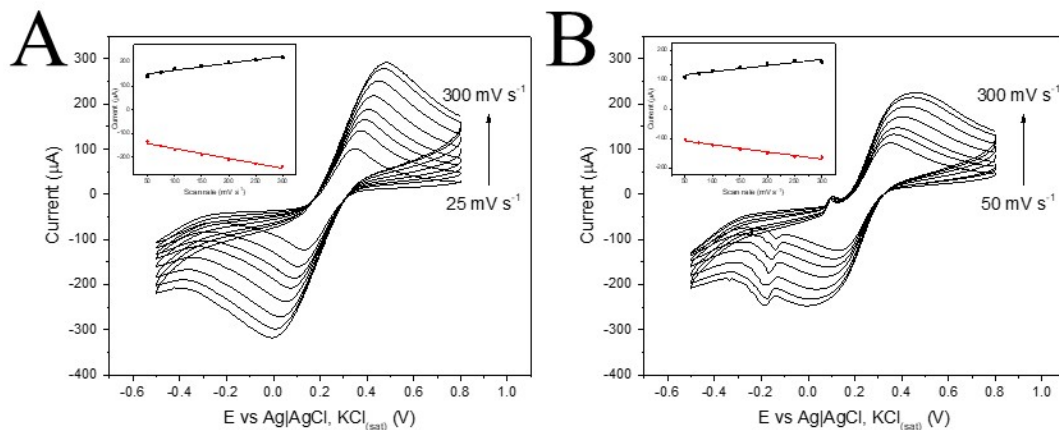

23

24 **Figure S3.** Cyclic voltammograms of  $[\text{Fe}(\text{CN})_6]^{-3/4}$  in KCl solution for the study of scan  
 25 rate in order to estimate the electroactive area of sensors (A) unmodified and (B)  
 26 AgNPs@Gr/StPE electrode. Data: equations for the unmodified electrode –  $I_{pa} = 0.2983$   
 27  $v^{1/2} + 135.9$  ( $R^2 = 0.976$ ) and  $I_{pc} = -0.3175 v^{1/2} - 122.6$  ( $R^2 = 0.988$ ); equations for the  
 28 modified electrode –  $I_{pa} = 0.2095 v^{1/2} + 106.8$  ( $R^2 = 0.958$ ) and  $I_{pc} = -0.2473 v^{1/2} -$   
 29  $96.52$  ( $R^2 = 0.980$ ).

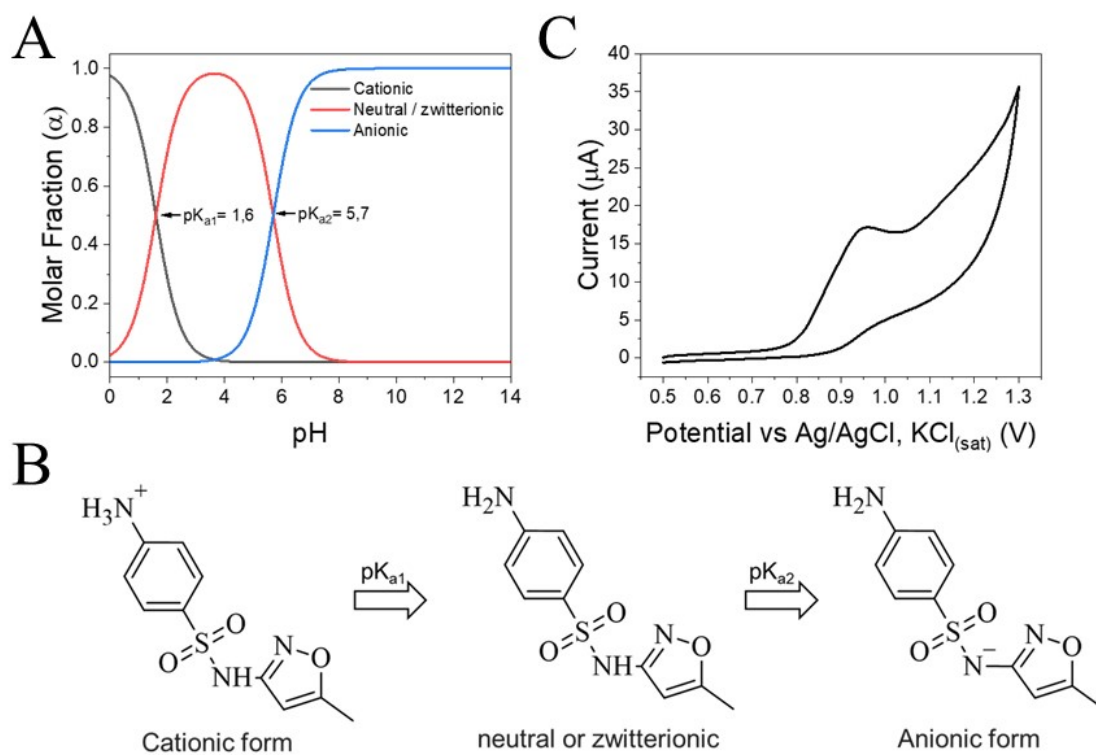

30

31 **Figure S4.** (A) SMZ species distribution and fraction at different pH values. (B) Species  
 32 of SMZ present in each pH range. (C) CV voltammogram at pH 6.0 isolated from the pH  
 33 study.

34

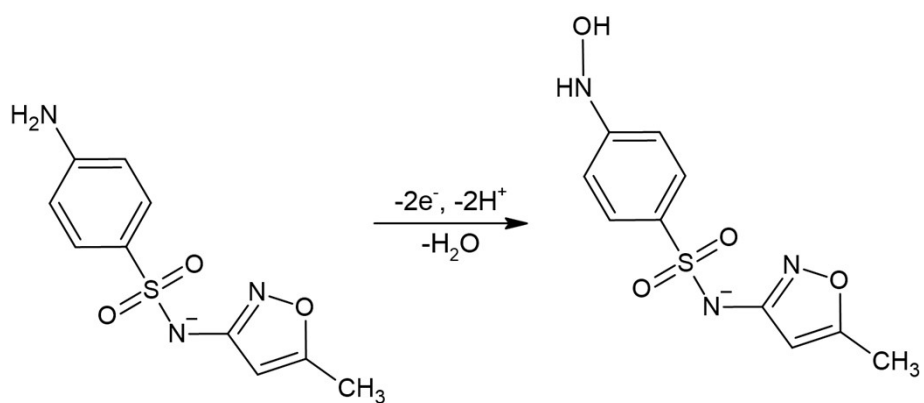

35

36 **Figure S5.** Electrochemical redox mechanism of SMZ at AgNPs@Gr/StPE surface.

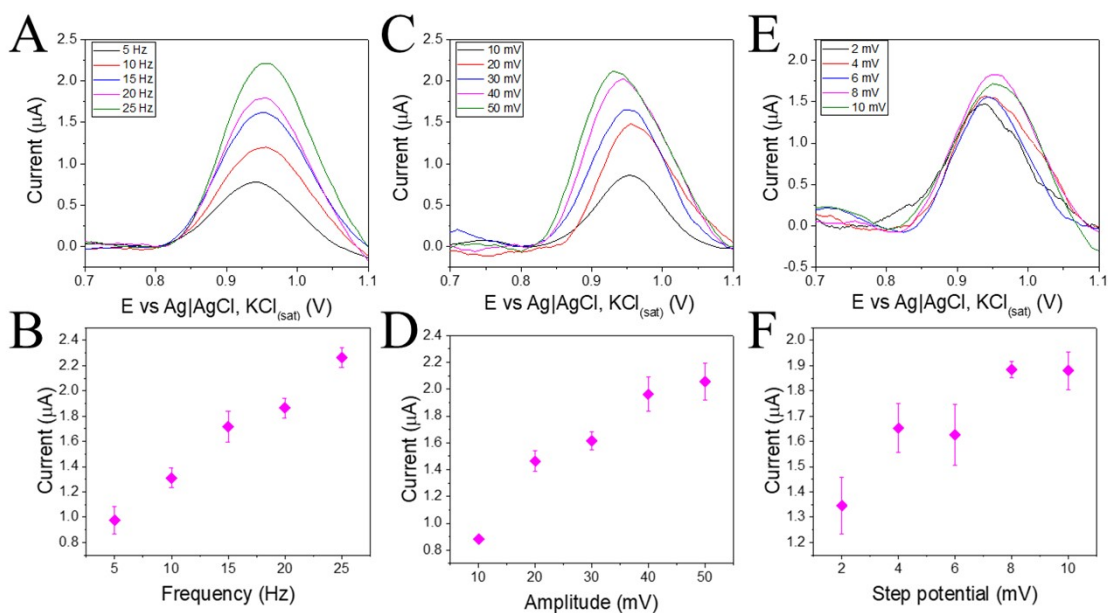

37

38 **Figure S6.** (A) Voltammogram obtained by SWV for frequency optimization. (B) Graph  
 39 of peak current as a function of frequency variation from 5 to 25 Hz. (C) Voltammogram  
 40 obtained by SWV for amplitude optimization. (B) Graph of peak current as a function of  
 41 amplitude variation from 10 to 50 mV. (E) Voltammogram obtained by SWV for step  
 42 potential optimization. (F) Graph of peak current as a function of step potential variation  
 43 from 2 to 10 mV.
